# Supplementary material for: Facile Construction and Fabrication of a Superhydrophobic and Super Oleophilic Stainless Steel Mesh for Separation of Water and Oil
Source: MDPI journal article supplement (doi:10.3390/nano12101661), 2022-05-13
Supplement: s1 [file s1]

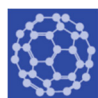

## Supplementary Materials

# Facile construction and fabrication of a superhydrophobic and super oleophilic stainless steel mesh for separation of water and oil

Yinyu Sun, Zhongcheng Ke\*, Caiyun Shen, Qing Wei, Ruikang Sun, Wei Yang and Zihan Yin

School of Chemistry and Chemical Engineering, Huangshan University, Huangshan 245021, Anhui, China; yysun\_hsu@163.com

\* Correspondence: xiaoke1020@126.com; Tel.: +86-13955997920

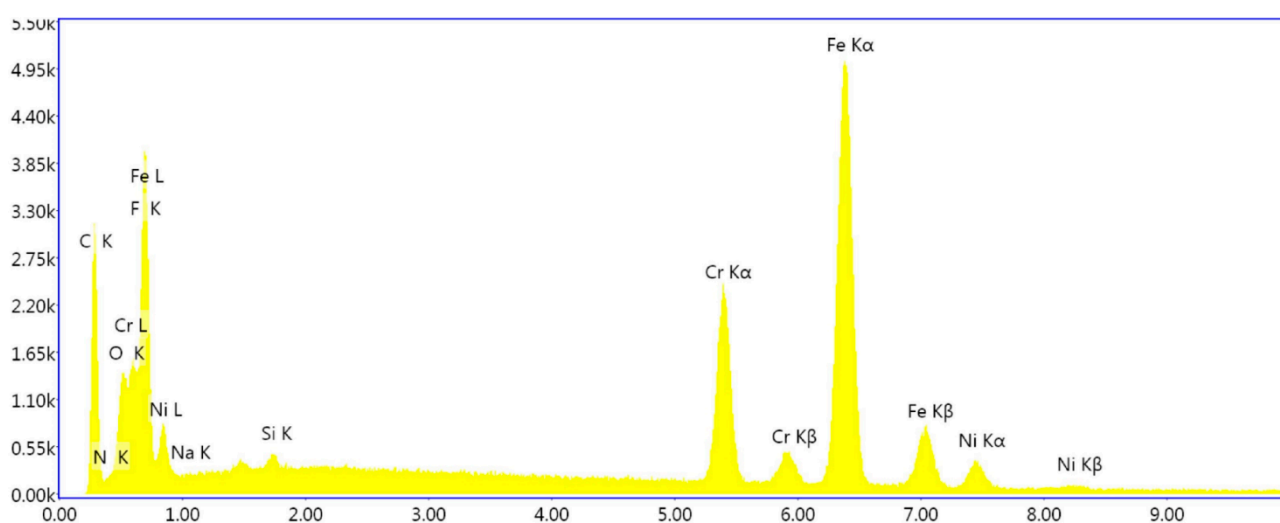

Figure S1. Images of SSM on EDS elemental analysis.

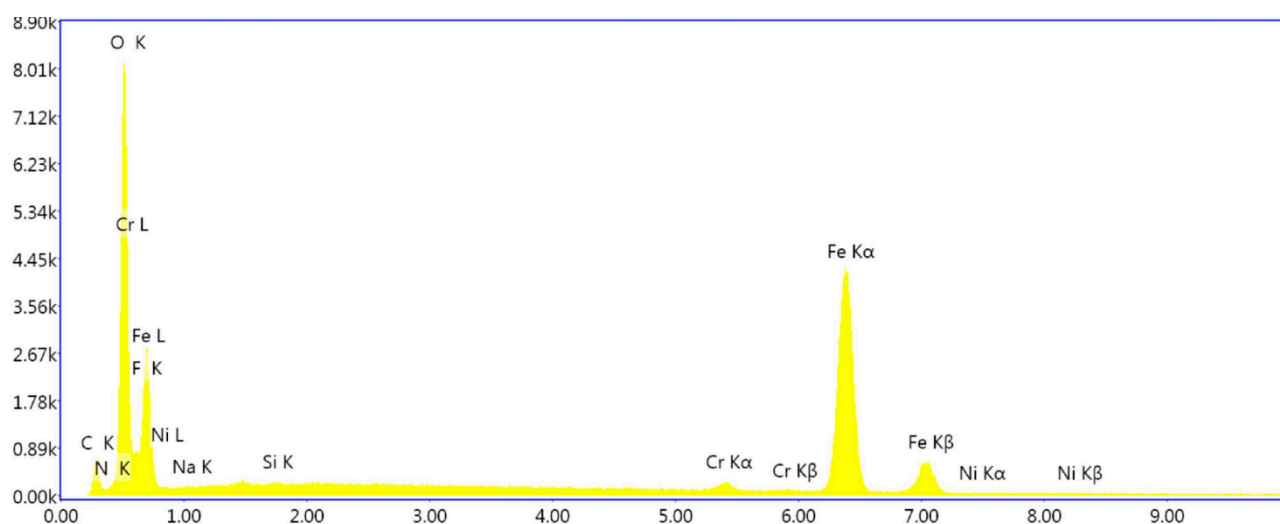

Figure S2. Images of Fe<sub>2</sub>O<sub>3</sub>-NCs@SSM on EDS elemental analysis.

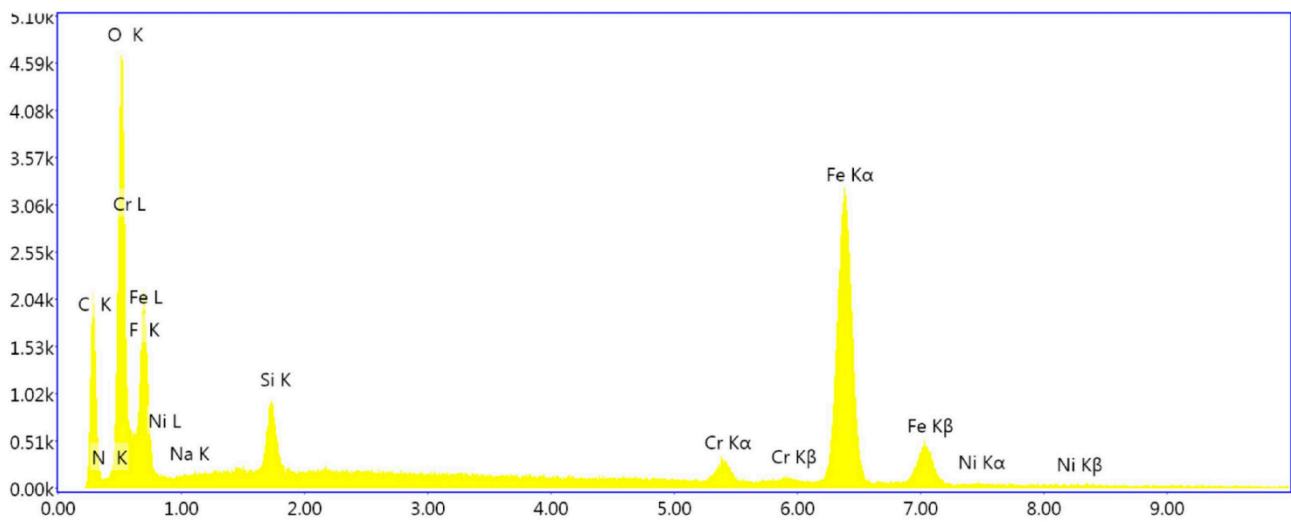

**Figure S3.** Images of OTS@Fe<sub>2</sub>O<sub>3</sub>-NCs@SSM on EDS elemental analysis.

**Table 1.** Zeta potential values of the samples.

| Sample                                      | Zeta potential (mv) | Stdev (mv) | Test device         |
|---------------------------------------------|---------------------|------------|---------------------|
| SSM                                         | -63.25              | 5.01       | SurPass, Anton Paar |
| Fe <sub>2</sub> O <sub>3</sub> -NCs@SSM     | -45.09              | 5.71       | SurPass, Anton Paar |
| OTS@Fe <sub>2</sub> O <sub>3</sub> -NCs@SSM | -27.83              | 6.81       | SurPass, Anton Paar |
| Fe <sub>2</sub> O <sub>3</sub> -NCs         | -14.17              | 0.48       | Nano ZS90, Malvern  |
| OTS                                         | -26.10              | 0.36       | Nano ZS90, Malvern  |
